# Supplementary material
Source: PubMed Central journal article supplement (PMC8022888)
Supplement: NIHMS1680025-supplement-eFigure4.pdf [file NIHMS1680025-supplement-eFigure4.pdf]

# Major Depressive Disorder

# Healthy Controls

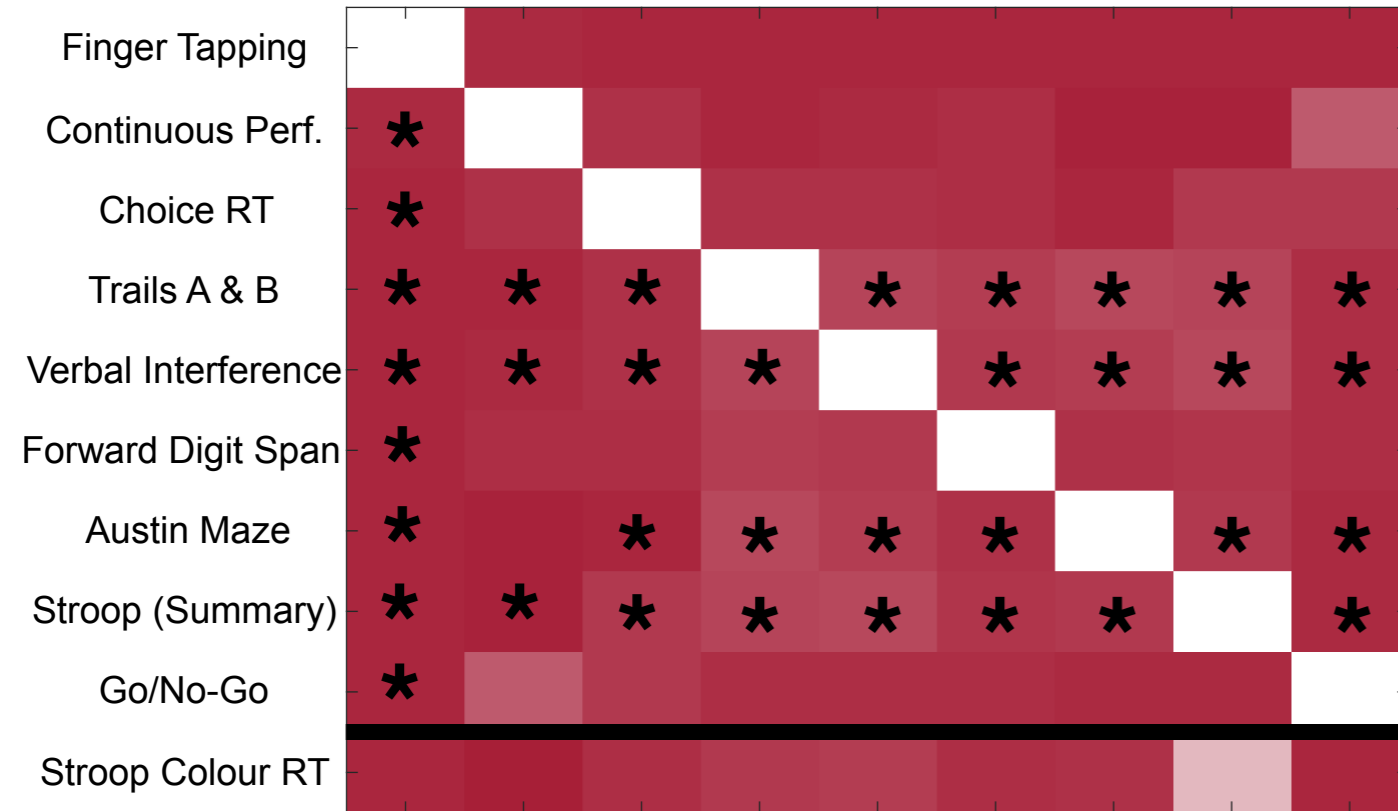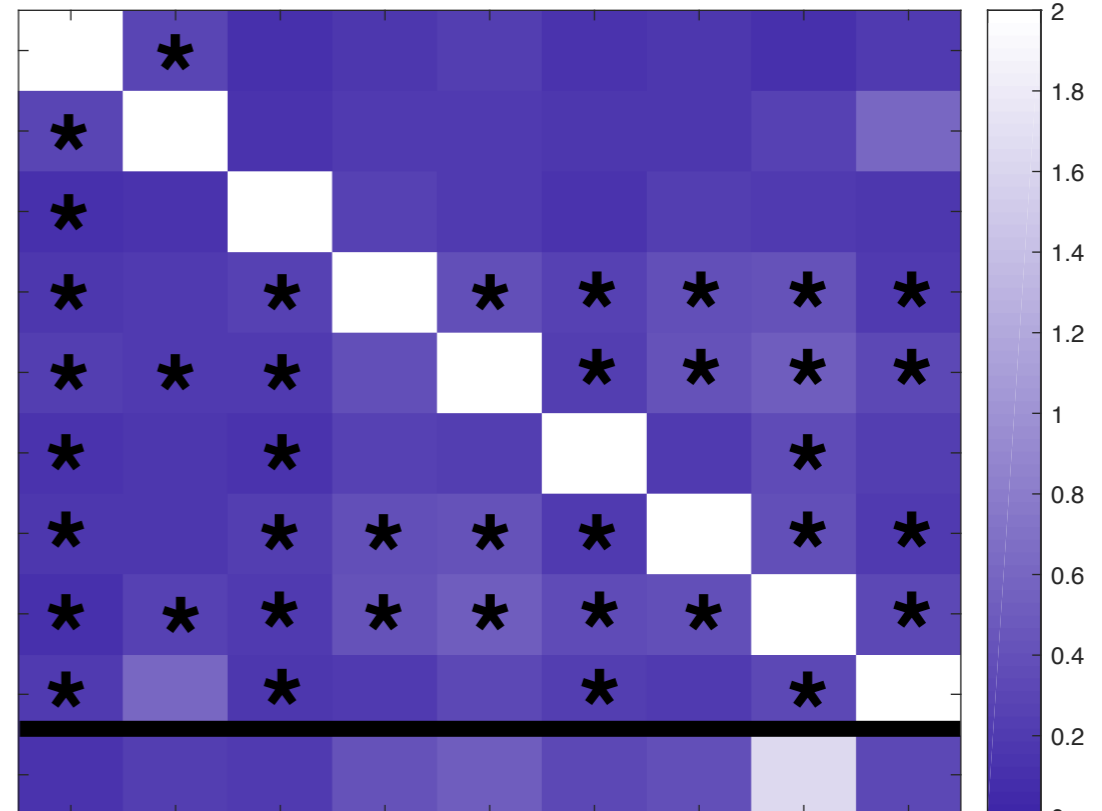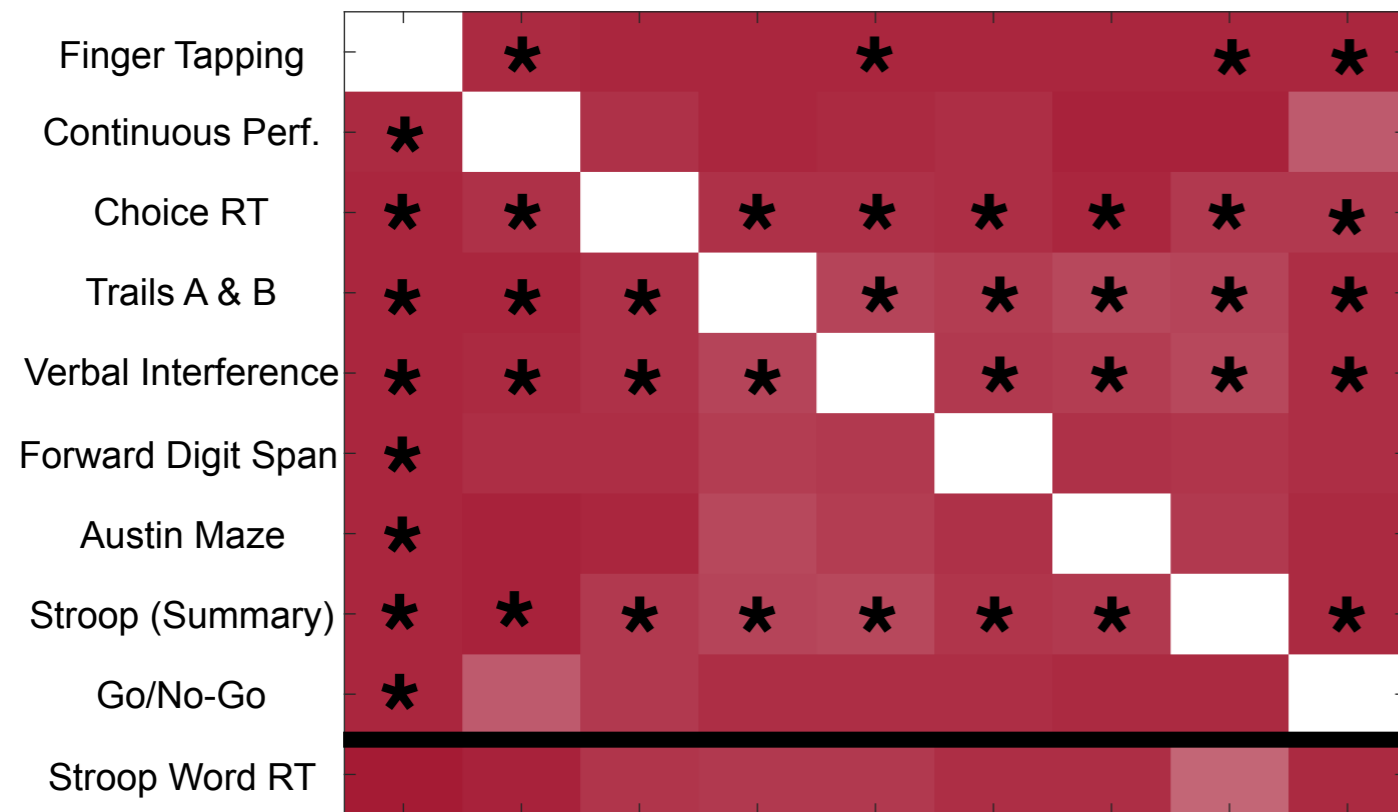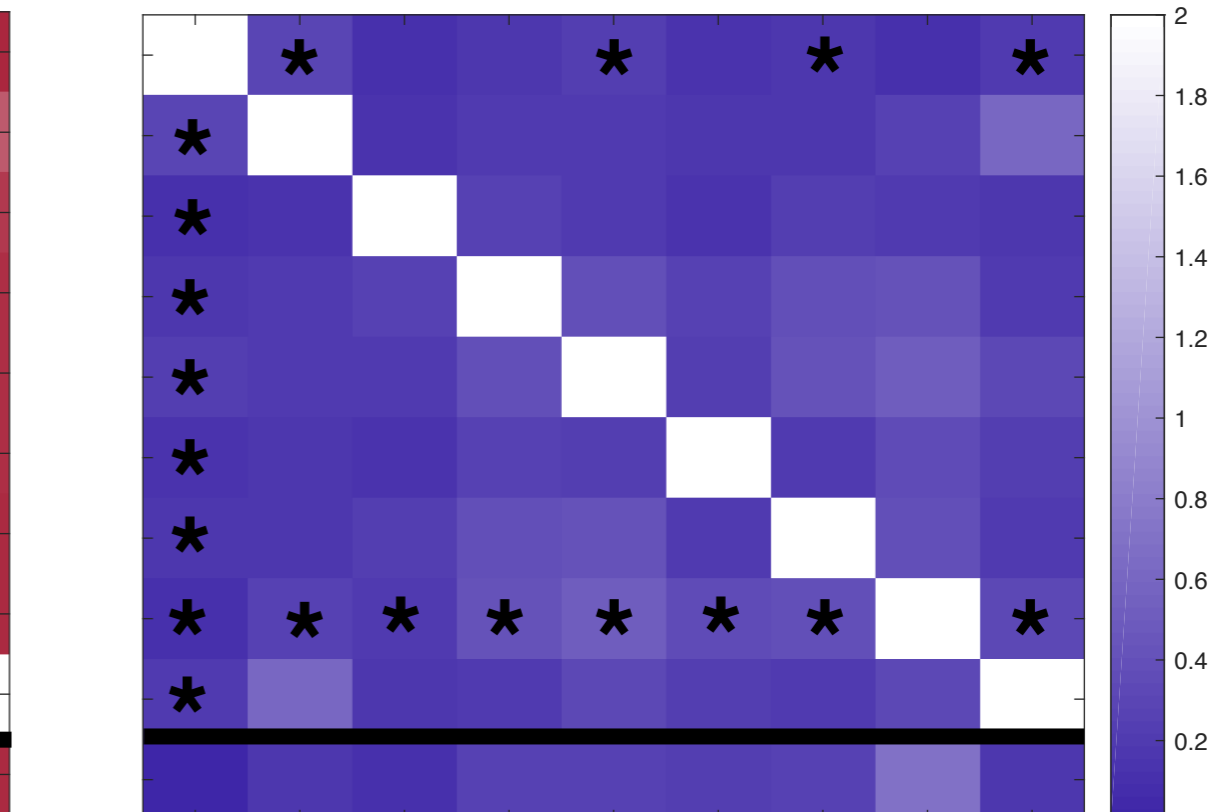

Finger Tapping  
 Continuous Perf.  
 Choice RT  
 Trails A & B  
 Verbal Interference  
 Forward Digit Span  
 Austin Maze  
 Stroop (Summary)  
 Go/No-Go

Finger Tapping  
 Continuous Perf.  
 Choice RT  
 Trails A & B  
 Verbal Interference  
 Forward Digit Span  
 Austin Maze  
 Stroop (Summary)  
 Go/No-Go
