# Supplementary material
Source: PubMed Central journal article supplement (PMC8022888)

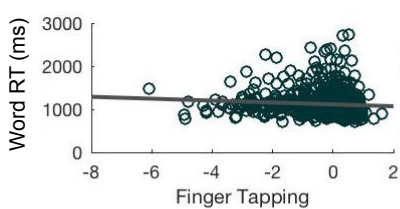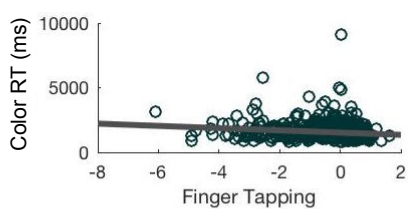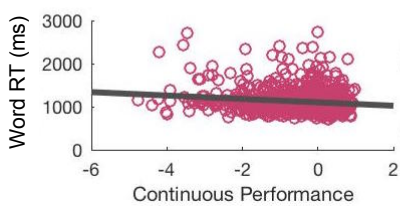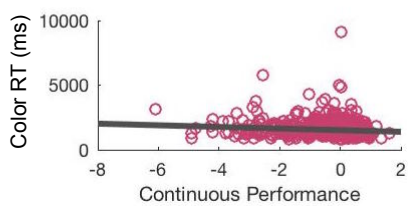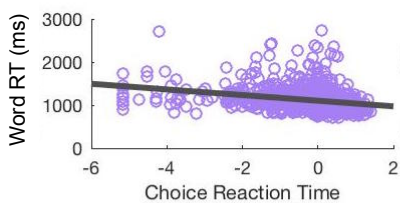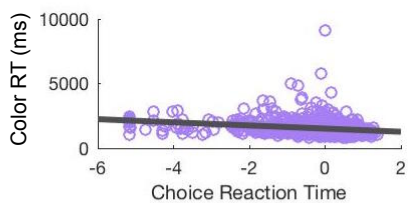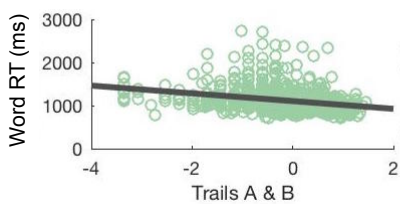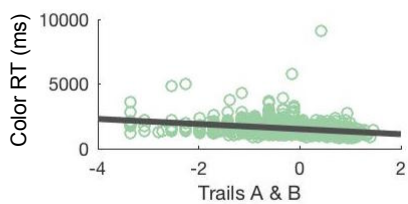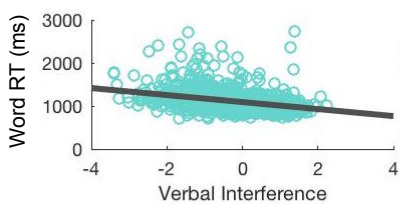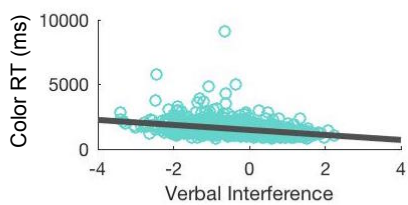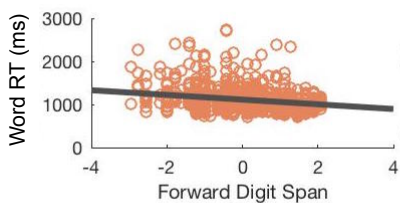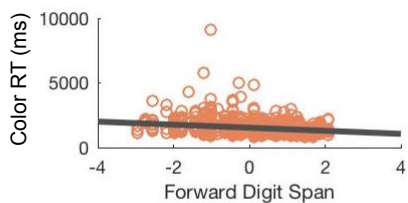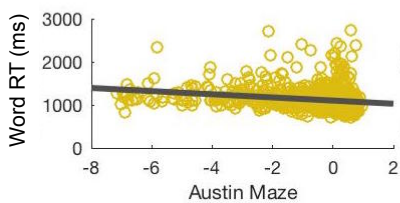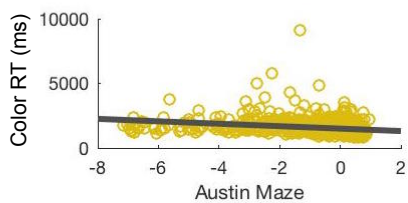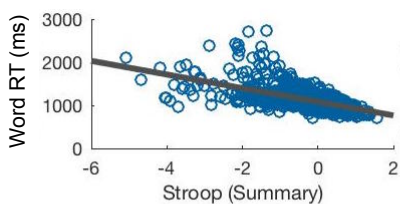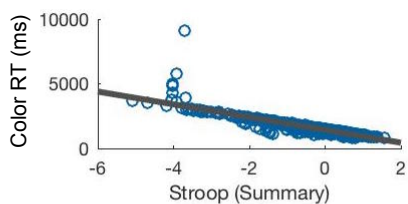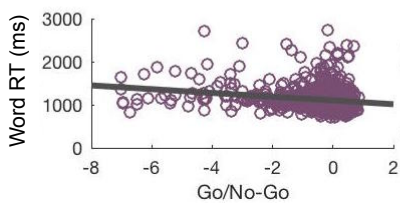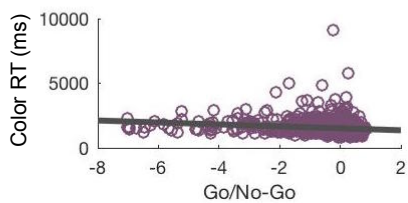

Supplement: NIHMS1680025-supplement-eFigure1.pdf [file NIHMS1680025-supplement-eFigure1.pdf]

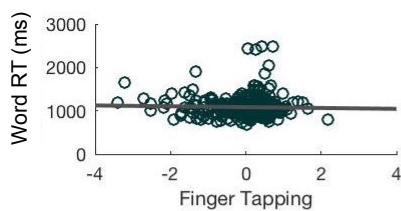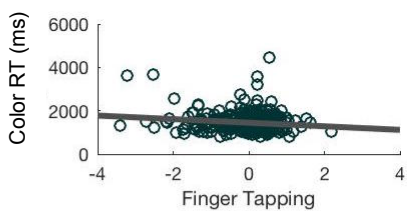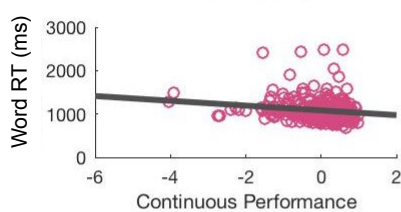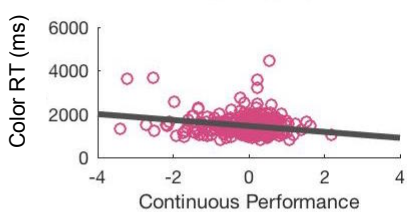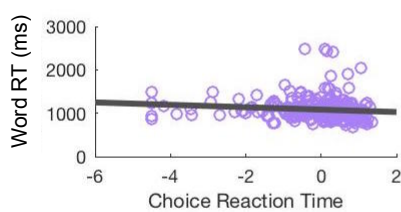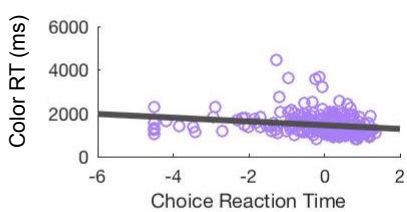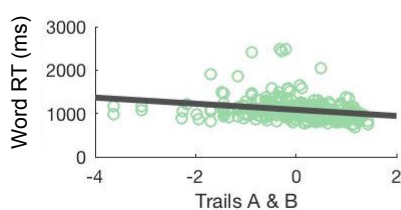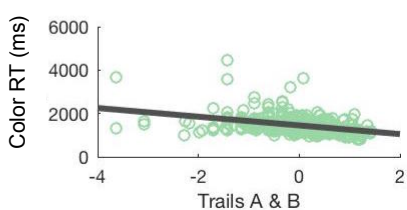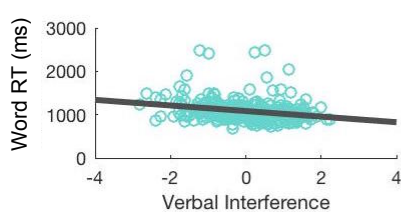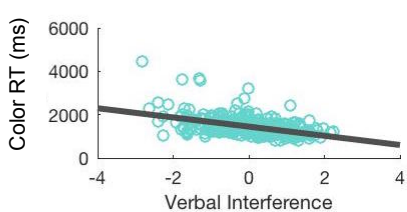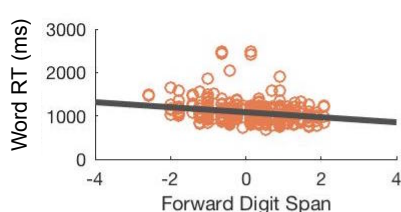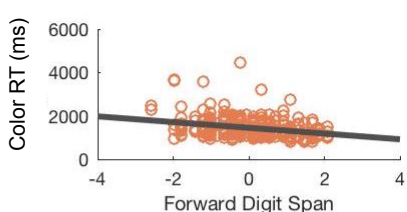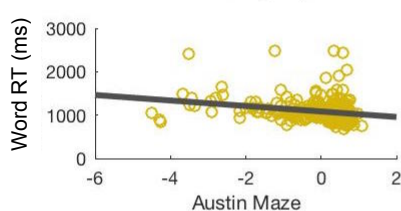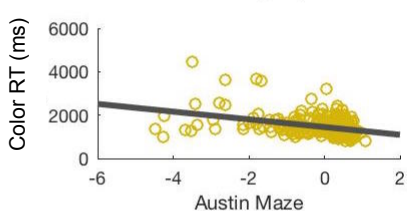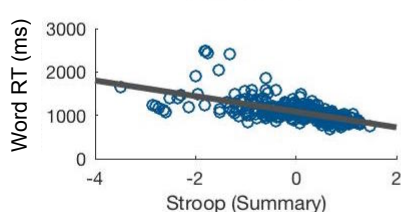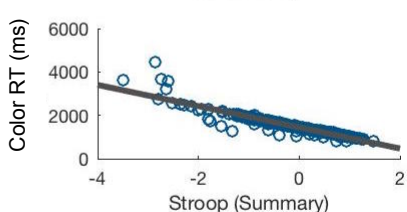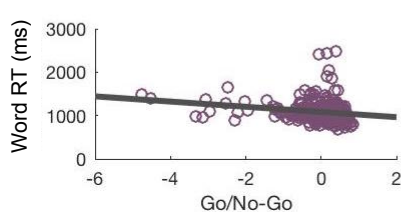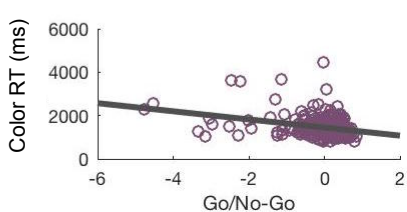

Supplement: NIHMS1680025-supplement-eFigure2.pdf [file NIHMS1680025-supplement-eFigure2.pdf]

**A****MDD Patients**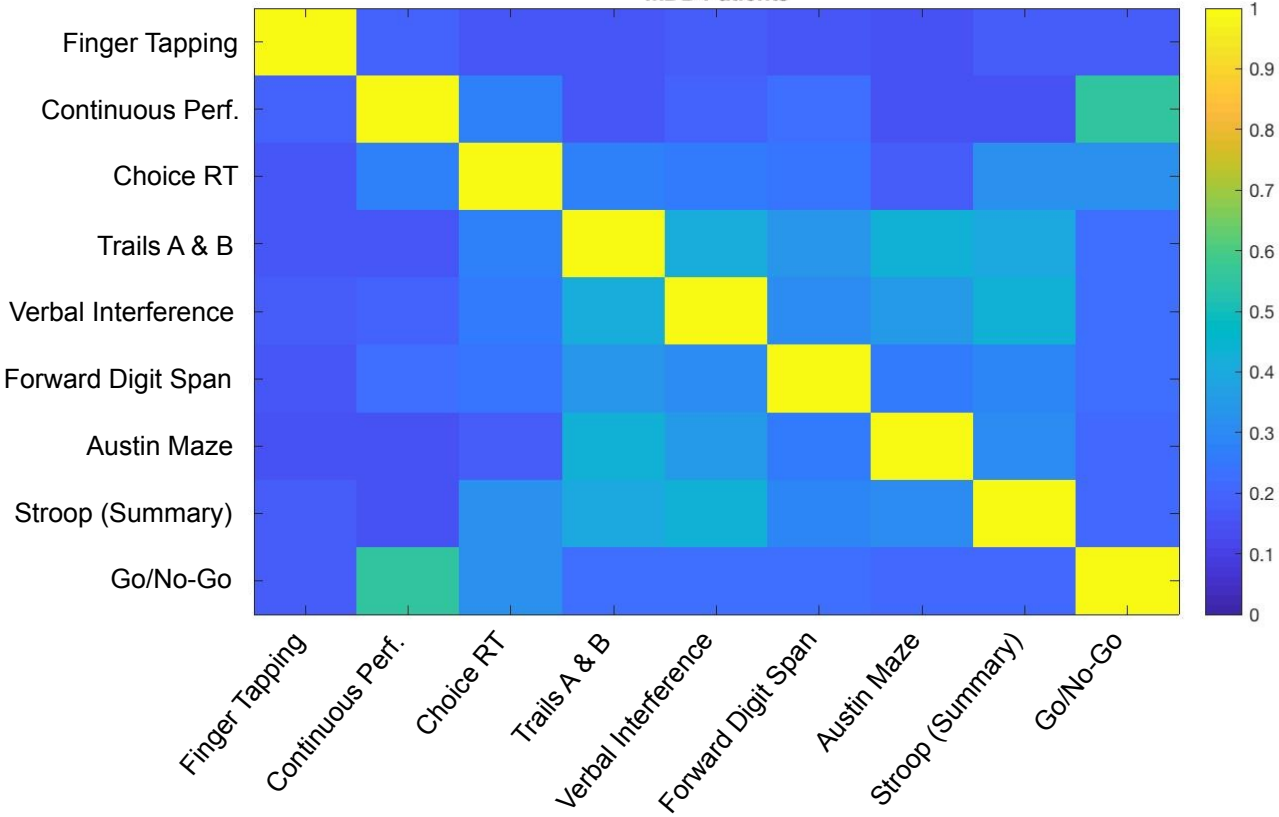**B****Healthy Controls**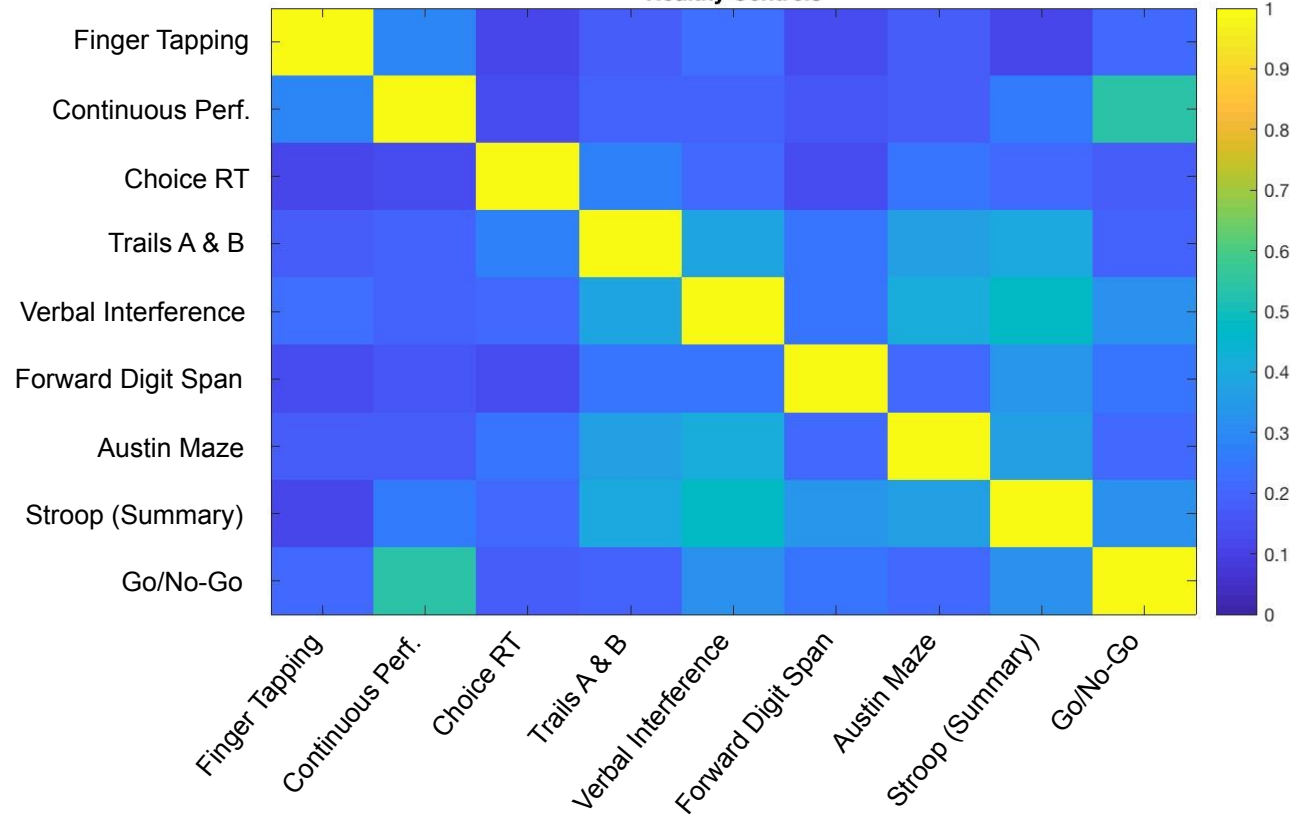

Supplement: NIHMS1680025-supplement-eFigure3.pdf [file NIHMS1680025-supplement-eFigure3.pdf]

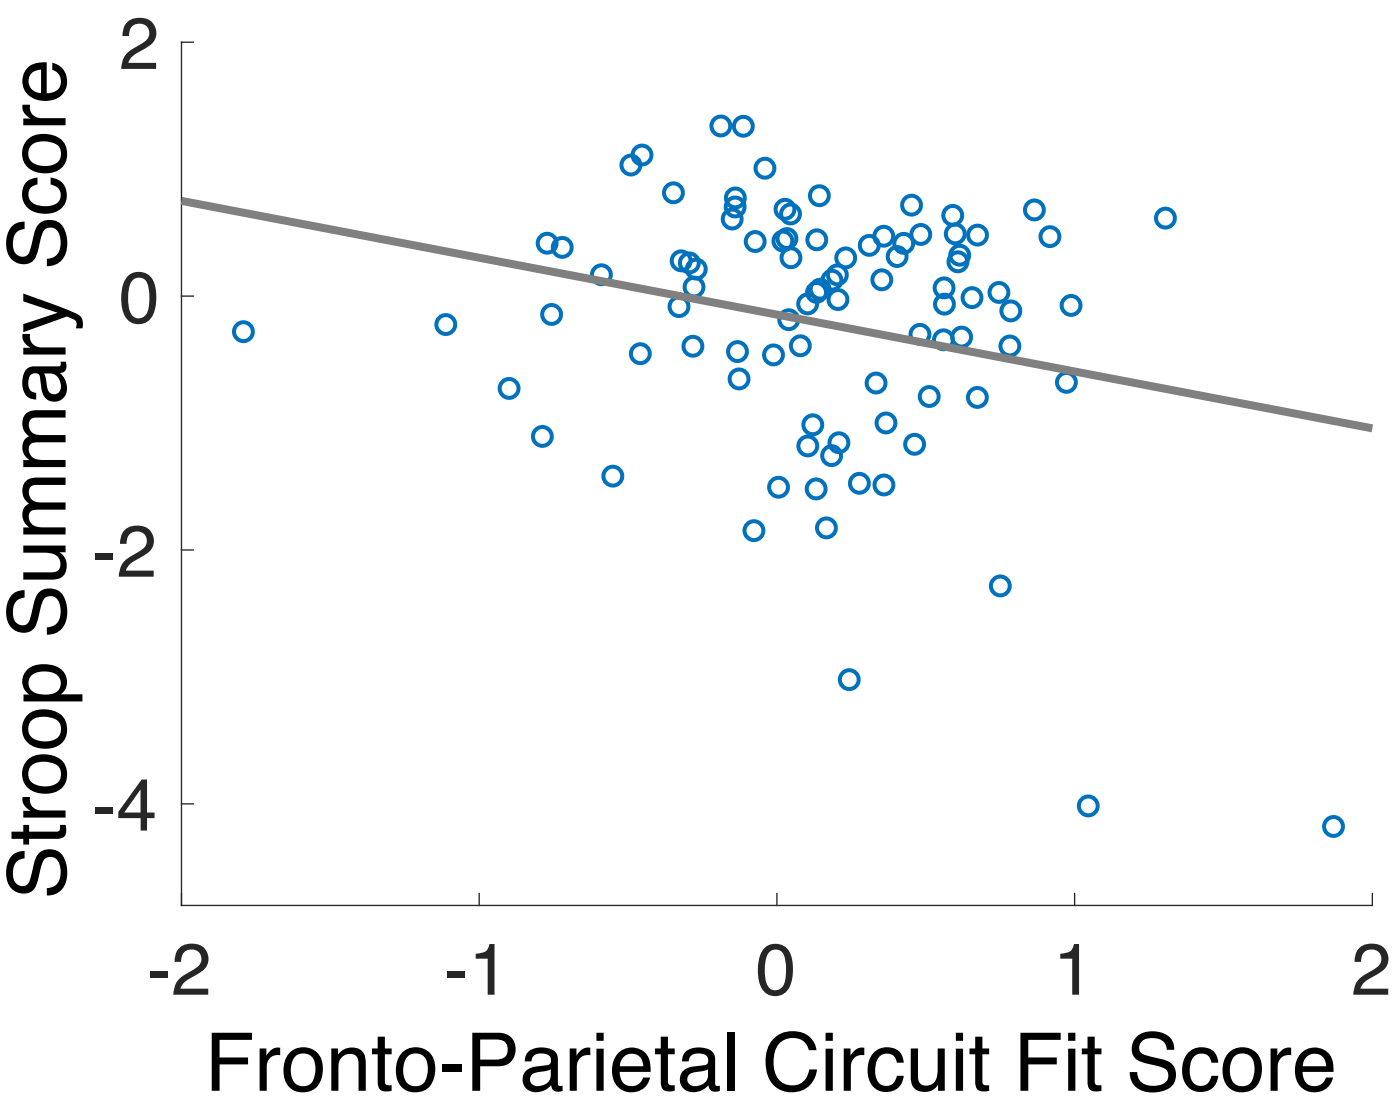

Supplement: NIHMS1680025-supplement-eFigure5.pdf [file NIHMS1680025-supplement-eFigure5.pdf]

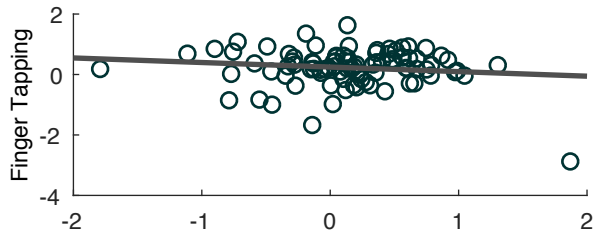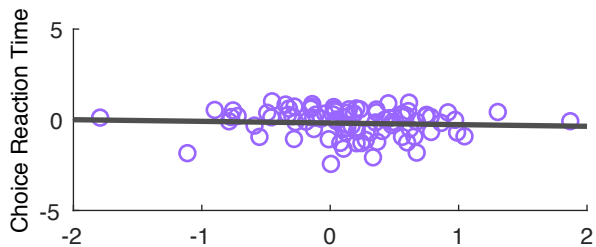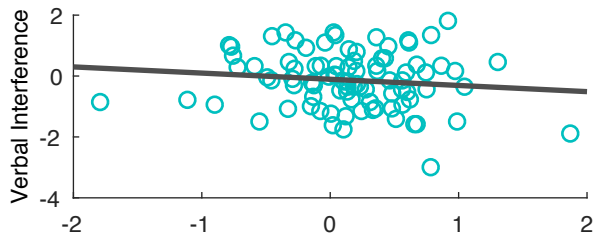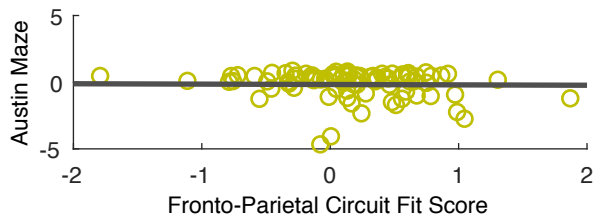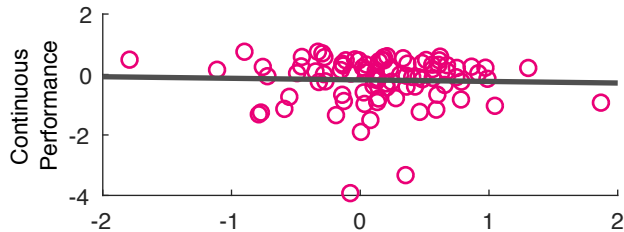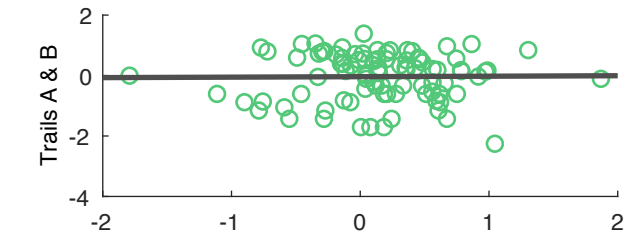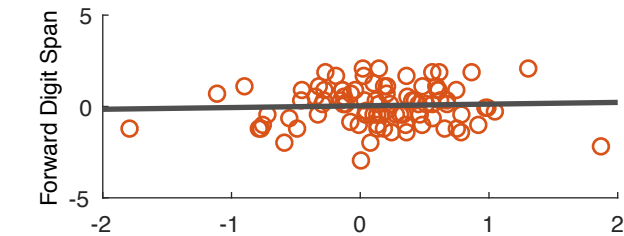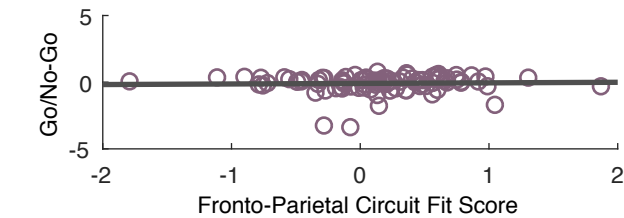

Supplement: NIHMS1680025-supplement-eFigure6.pdf [file NIHMS1680025-supplement-eFigure6.pdf]

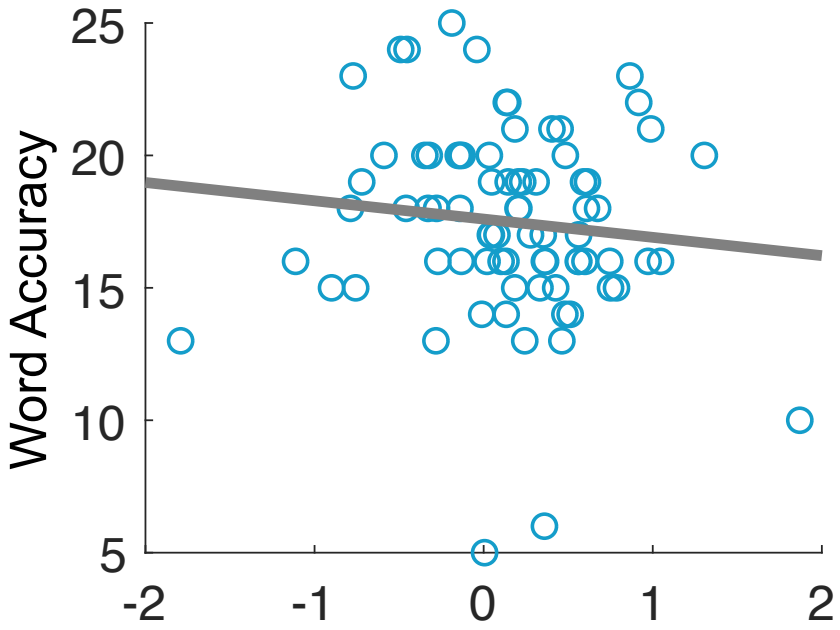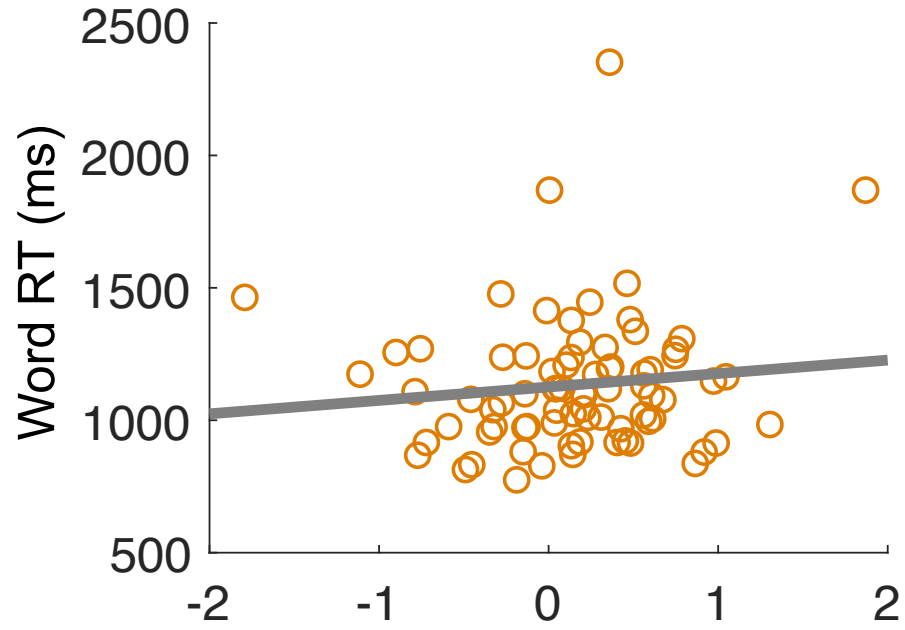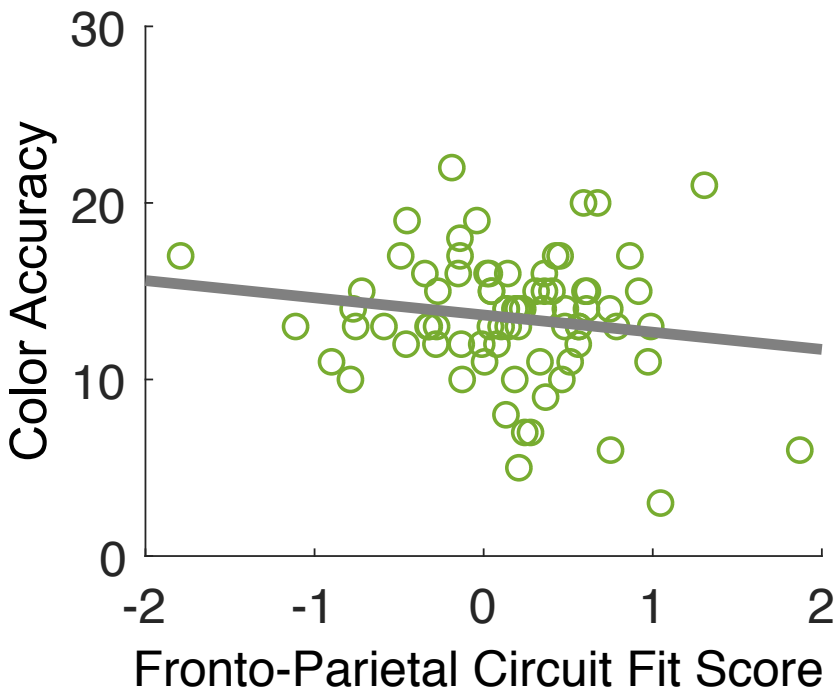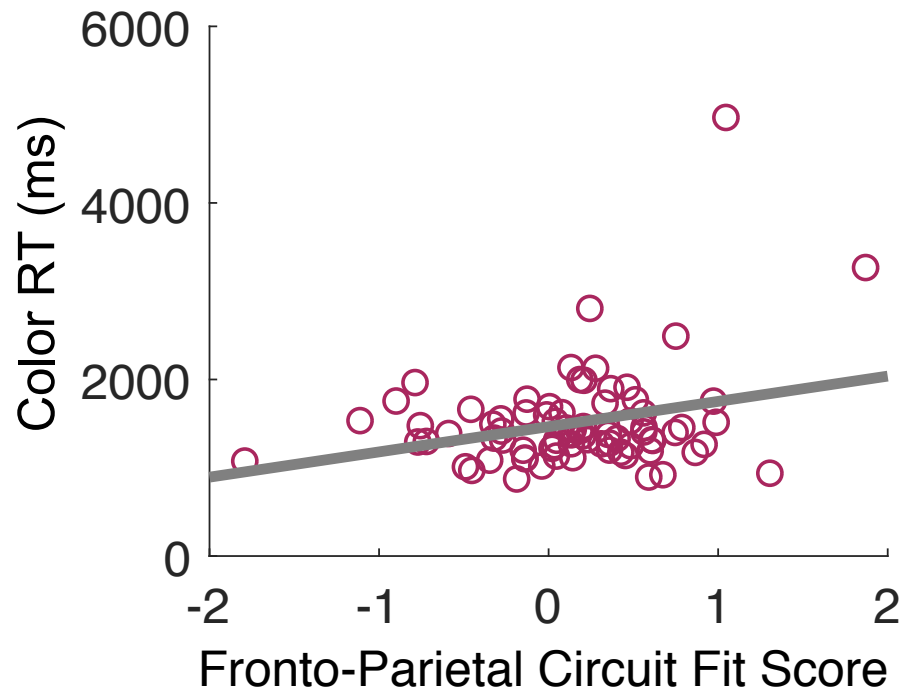

Supplement: NIHMS1680025-supplement-eFigure7.pdf [file NIHMS1680025-supplement-eFigure7.pdf]

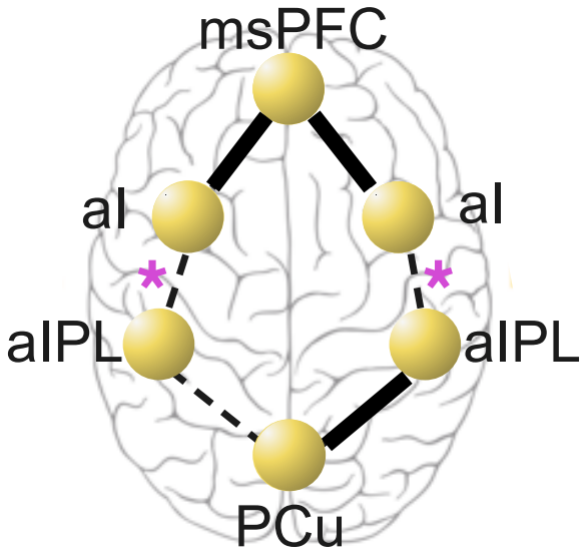

Supplement: NIHMS1680025-supplement-eFigure8.pdf [file NIHMS1680025-supplement-eFigure8.pdf]
